# Supplementary material for: A yolk–shell Fe3O4@void@carbon nanochain as shuttle effect suppressive and volume-change accommodating sulfur host for long-life lithium–sulfur batteries
Source: Royal Society of Chemistry journal article supplement (doi:10.1039/d1nr00658d), 2021-01-01
Supplement: d1nr00658d1.pdf [file d1nr00658d1.pdf]

Electronic Supplementary Information (ESI) for Chemical Communications. This journal is  
(c) The Royal Society of Chemistry 2021.

Electronic Supplementary Information (ESI)

**A Yolk-Shell  $\text{Fe}_3\text{O}_4@$ Void@Carbon Nanochain as Shuttle Effect  
Suppressive and Volume-Change Accommodable Sulfur Host for  
Long-Life Lithium-Sulfur Batteries**

Ting Zhou,<sup>a,1</sup> Zihan Shen,<sup>b,1</sup> Yong Wu,<sup>a</sup> Tianli Han,<sup>a</sup> Yan Zhong,<sup>a</sup> Yajun Zhu,<sup>a</sup>

Huigang Zhang,<sup>\*,b</sup> Jinyun Liu<sup>\*,a</sup>

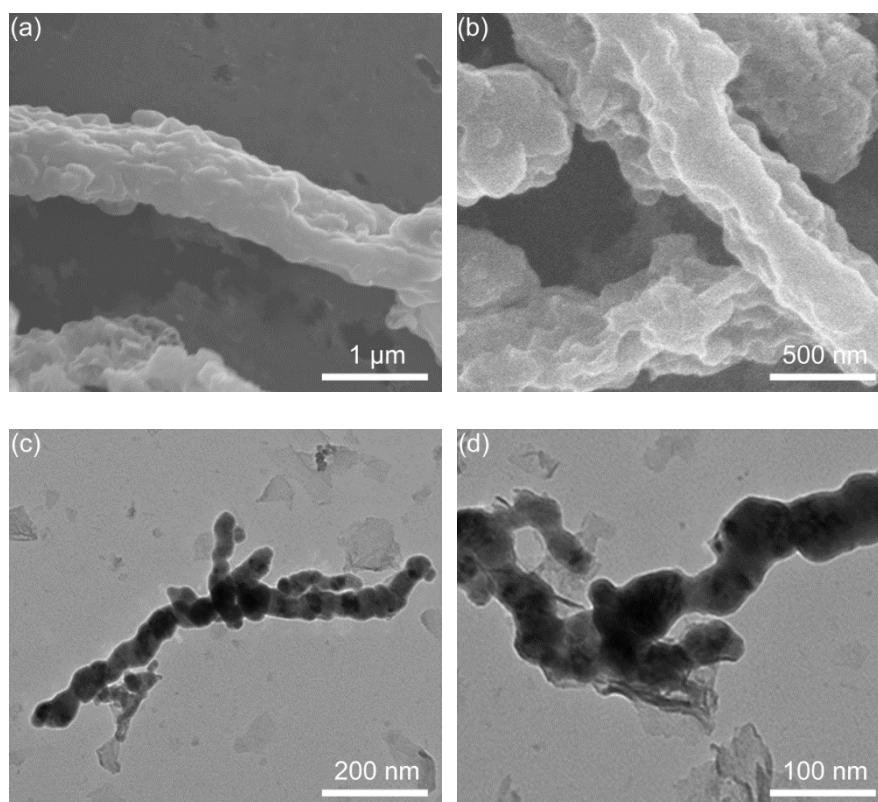

**Fig. S1** (a, b) SEM and (c, d) TEM images of the carbon-coated  $\text{Fe}_3\text{O}_4$  nanochain.

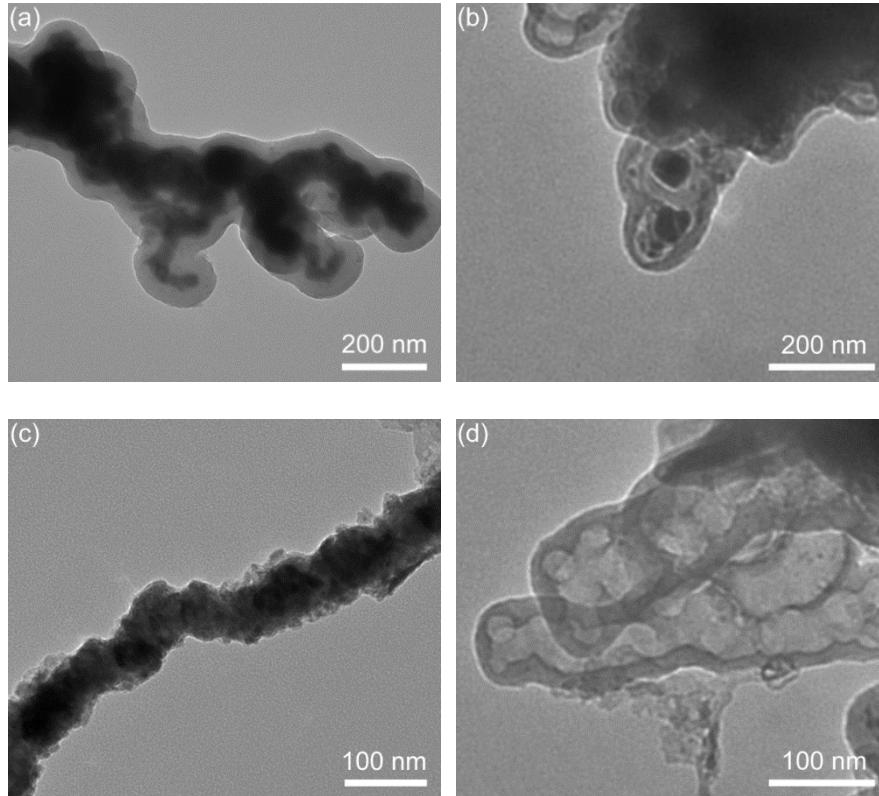

**Fig. S2** TEM images of the  $\text{Fe}_3\text{O}_4@\text{C}$  after etching by 0.2 M HCl solution for (a, b) 30 min, (c) 20 min, and (d) 60 min.

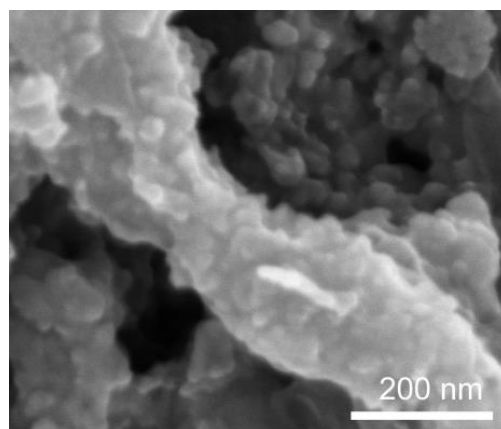

**Fig. S3** SEM image of the  $\text{Fe}_3\text{O}_4@\text{S}@\text{C}$  nanochain after 500 cycles at 0.2C.

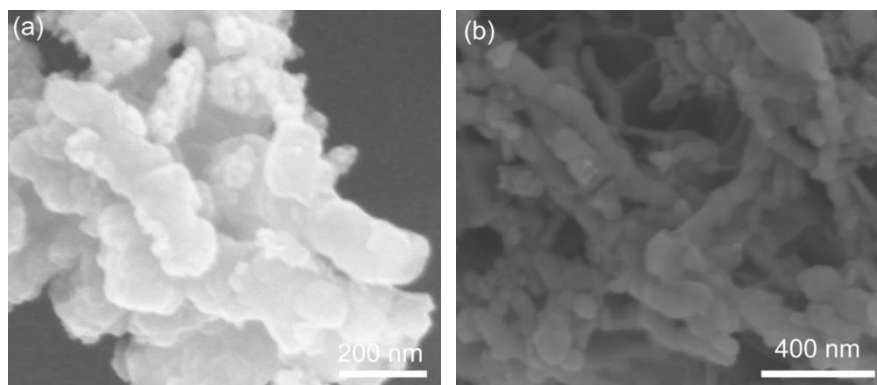

**Fig. S4** (a, b) SEM images of the Fe<sub>3</sub>O<sub>4</sub>@S prepared by directly coating sulfur onto the Fe<sub>3</sub>O<sub>4</sub> nanochains.

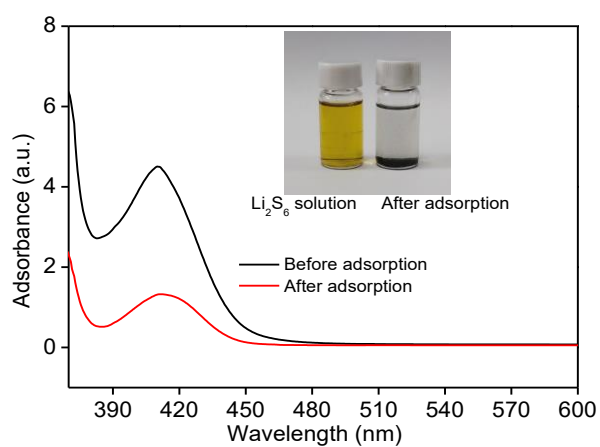

**Fig. S5** UV-vis spectra of the Li<sub>2</sub>S<sub>6</sub> solution before and after adsorption by the Fe<sub>3</sub>O<sub>4</sub>@void@C nanochain host. Inset shows the photo of the initial Li<sub>2</sub>S<sub>6</sub> solution and the one after adsorption.

**Table S1.** Comparison on the electrochemical performance of some sulfur cathodes.

| Cathode materials                                         | Preparation method                | Cycling rate | Cycling number | Capacity (mAh g <sup>-1</sup> ) | Ref.      |
|-----------------------------------------------------------|-----------------------------------|--------------|----------------|---------------------------------|-----------|
| S@TiO <sub>2</sub> @HCNBs                                 | Templated synthesis               | 0.5C         | 50             | 773                             | 1         |
| Carbon nanotube/S                                         | Thermal treatment                 | 0.1C         | 300            | 669                             | 2         |
| S/PPy-MnO <sub>2</sub>                                    | In situ polymerization            | 0.2C         | 200            | 985                             | 3         |
| S@CNTs/CoS                                                | Hydrothermal approach             | 0.2C         | 100            | 762                             | 4         |
| Yolk-shell Co-V@C/S                                       | Template-free solvothermal method | 0.2C         | 100            | 830                             | 5         |
| Yolk-shell S@Co-N-C/CNTs                                  | Hydrothermal method               | 0.5C         | 110            | 572                             | 6         |
| Yolk-shell NiS <sub>2</sub> /C-S                          | Hydrothermal method               | 0.2C         | 50             | 600                             | 7         |
| TiO <sub>2</sub> @TiN@S                                   | Hydrothermal method               | 0.2C         | 500            | 533                             | 8         |
| Au@MCNSs/S                                                | Self-crosslinking procedure       | 0.1C         | 40             | 664                             | 9         |
| Yolk-shell Fe <sub>3</sub> O <sub>4</sub> @S@C nanochains | Hydrothermal method               | 0.2C         | 500            | 625                             | This work |

## References

1. H. Gu, H. Wang, R. Zhang, T. Yao, T. Liu, J. Wang, X. Han and Y. Cheng, *Ind. Eng. Chem. Res.*, 2019, **58**, 18197-18204.
2. Y. W. Xu, B. H. Zhang, G. R. Li, S. Liu and X. P. Gao, *ACS Appl. Energy Mater.*, 2020, **3**, 487-494.
3. J. Zhang, Y. Shi, Y. Ding, W. Zhang and G. Yu, *Nano Lett.*, 2016, **16**, 7276-7281.
4. L. Ma, W. Zhang, L. Wang, Y. Hu, G. Zhu, Y. Wang, R. Chen, T. Chen, Z. Tie, J.

- Liu and Z. Jin, *ACS Nano*, 2018, **12**, 4868-4876.
5. W. Ren, L. Xu, L. Zhu, X. Wang, X. Ma and D. Wang, *ACS Appl. Mater. Inter.*, 2018, **10**, 11642-11651.
  6. R. Liu, Q. Kang, W. Liu, Z. Liu, Y. Liu, Y. Wang, J. Chen, B. Hultman, X. Lin, Y. Li, P. Li, Z. Huang, X. Feng, G. Wu, L. Yu and Y. Ma, *ACS Appl. Energy Mater.*, 2018, **1**, 6487-6496.
  7. Y. Tian, H. Huang, G. Liu, R. Bi and L. Zhang, *Chem. Commun.*, 2019, **55**, 3243-3246.
  8. W. Xu, H. Pang, H. Zhou, Z. Jian, R. Hu, Y. Xing and S. Zhang, *RSC Adv.*, 2020, **10**, 2670-2676.
  9. W. Zhang, C. Yang, B. Ding, J. Peng, F. Xu, M. Zheng, H. Hu, Y. Xiao, Y. Liu and Y. Liang, *Chem. Commun.*, 2020, **56**, 1215-1218.
